# Supplementary material for: Surveillance of Antidepressant Safety (SADS): Active Signal Detection of Serious Medical Events Following SSRI and SNRI Initiation Using Big Healthcare Data
Source: PubMed Central journal article supplement — Drug Saf. 2021 Sep 8;44(11):1215–30. doi: 10.1007/s40264-021-01110-x (PMC8553683; doi:10.1007/s40264-021-01110-x), 2021-09-08
Supplement: 40264_2021_1110_MOESM1_ESM.pdf [file 40264_2021_1110_MOESM1_ESM.pdf]

## Electronic Supplementary Materials for *Drug Safety*

Surveillance of AntiDepressant Safety (SADS): Active signal detection of serious medical events following SSRI and SNRI initiation using big healthcare data

Mia Aakjær<sup>1</sup>, Marie Louise De Bruin<sup>2,3</sup>, Murat Kulahci<sup>4,5</sup>, Morten Andersen<sup>1</sup>

(1) Pharmacovigilance Research Center, Department of Drug Design and Pharmacology, University of Copenhagen, Copenhagen, Denmark.

(2) Copenhagen Centre for Regulatory Science (CORS), Department of Pharmacy, University of Copenhagen, Copenhagen, Denmark.

(3) Utrecht Institute for Pharmaceutical Sciences (UIPS), Division of Pharmacoepidemiology and Clinical Pharmacology, Utrecht University, Utrecht, the Netherlands.

(4) Department of Applied Mathematics and Computer Science, Technical University of Denmark, Lyngby, Denmark.

(5) Department of Business Administration, Technology and Social Sciences, Luleå University of Technology, Luleå, Sweden.

Corresponding author:

Mia Aakjær

E-mail: mia.aakjaer@sund.ku.dk

**Table S1** Charlson comorbidities and other covariates

| Covariate                                                | Definition                                                                                                                                |
|----------------------------------------------------------|-------------------------------------------------------------------------------------------------------------------------------------------|
| <i>Charlson comorbidities</i>                            |                                                                                                                                           |
| Diabetes without complication                            | ICD-8: 249.00, 249.06, 249.07, 249.09, 250.00, 250.06, 250.07, 250.09<br>ICD-10: E10.0, E10.1, E10.9, E11.0, E11.1, E11.9                 |
| Diabetes with complications                              | ICD-8: 249.01-249.05, 249.08, 250.01-250.05, 250.08<br>ICD-10: E10.2-E10.8, E11.2-E11.8                                                   |
| Myocardial infarction                                    | ICD-8: 410<br>ICD-10: I21, I22, I23                                                                                                       |
| Peripheral vascular disease                              | ICD-8: 440-445<br>ICD-10: I70, I71, I72, I73, I74, I77                                                                                    |
| Congestive heart failure                                 | ICD-8: 427.09, 427.10, 427.11, 427.19, 428.99, 782.49<br>ICD-10: I11.0, I13.0, I13.2, I50                                                 |
| Moderate/severe renal disease                            | ICD-8: 403, 404, 580-583, 584, 590.09, 593.19, 753.10-753.19, 792<br>ICD-10: I12, I13, N00-N05, N07, N11, N14, N17, N18, N19, Q61         |
| Mild liver disease                                       | ICD-8: 571, 573.01, 573.04<br>ICD-10: B18, K70.0-K70.3, K70.9, K71, K73, K74, K76.0                                                       |
| Moderate/severe liver disease                            | ICD-8: 070.00, 070.02, 070.04, 070.06, 070.08, 456.00-456.09, 573.00<br>ICD-10: B15.0, B16.0, B16.2, B19.0, I85, K70.4, K72, K76.6        |
| Cerebrovascular disease                                  | ICD-8: 430-438<br>ICD-10: I60-I69, G45, G46                                                                                               |
| Chronic pulmonary disease                                | ICD-8: 490-493, 515-518<br>ICD-10: J40-J47, J60-J67, J68.4, J70.1, J70.3, J84.1, J92.0, J96.1, J98.2, J98.3                               |
| Cancer                                                   | ICD-8: 140-172, 174-194, 204-207, 195-199, 200-203, 204-207, 275.59<br>ICD-10: C00-C43, C45-C75, C76-C80, C81-C85, C88, C90, C91-C95, C96 |
| Dementia                                                 | ICD-8: 290.09-290.19, 293.09<br>ICD-10: F00-F03, F05.1, G30                                                                               |
| Connective tissue disease                                | ICD-8: 135.99, 446, 712, 716, 734<br>ICD-10: M05, M06, M08, M09, M30, M31, M32, M33, M34, M35, M36, D86                                   |
| Ulcer disease                                            | ICD-8: 530.91, 530.98, 531-534<br>ICD-10: K22.1, K25-K28                                                                                  |
| Hemiplegia                                               | ICD-8: 344<br>ICD-10: G81, G82                                                                                                            |
| AIDS                                                     | ICD-8: 079.83<br>ICD-10: B21, B22, B23, B24                                                                                               |
| <i>Other</i>                                             |                                                                                                                                           |
| Alcohol-related diseases                                 | ICD-8: 303, 570, 571.00, 571.10, 573.00, 573.01, 577.10, 979, 980<br>ICD-10: F10, T51, Z92.1, R78.0, K70, K71.1-K71.2, K86<br>ATC: N07BB  |
| Hypertension                                             | ICD-8: 400-404<br>ICD-10: I10-I13, I15                                                                                                    |
| Dyslipidemia                                             | ICD-8: 272<br>ICD-10: E78                                                                                                                 |
| Obesity                                                  | ICD-8: 277.99<br>ICD-10: E66<br>ATC: A08A                                                                                                 |
| Schizophrenia and schizophrenia-related disorders        | ICD-8: 295, 297, 298.3, 298.9, 299<br>ICD-10: F20-F23, F25, F28, F29                                                                      |
| Bipolar affective disorder                               | ICD-8: 296.1, 296.3, 296.8<br>ICD-10: F30-F31                                                                                             |
| Anxiety disorder, including generalized anxiety disorder | ICD-8: 300.0, 300.2<br>ICD-10: F40-F41                                                                                                    |
| Personal disorders                                       | ICD-8: 301<br>ICD-10: F60                                                                                                                 |
| Unipolar depression                                      | ICD-8: 296.0, 296.2<br>ICD-10: F32, F33                                                                                                   |
| Other abuse                                              | ICD-8: 304<br>ICD-10: F11-F19                                                                                                             |
| Antipsychotics                                           | ATC: N05A                                                                                                                                 |

---

*AIDS* acquired immunodeficiency syndrome, *ATC* Anatomical Therapeutic Chemical, *ICD-8* International Classification of Diseases 8<sup>th</sup> revision, *ICD-10* International Classification of Diseases 10<sup>th</sup> revision

**Table S2** Parameters that can be tuned in the design and analysis

|                                   | Options                           |                                         |                                                                     |                                                               |                                         |
|-----------------------------------|-----------------------------------|-----------------------------------------|---------------------------------------------------------------------|---------------------------------------------------------------|-----------------------------------------|
|                                   | A                                 | B                                       | C                                                                   | D                                                             | E                                       |
| <i>Design choices</i>             |                                   |                                         |                                                                     |                                                               |                                         |
| Data sources                      | <b>Single database/country</b>    | Multiple databases/countries            |                                                                     |                                                               |                                         |
| Study design                      | <b>Cohort study</b>               | Case-control study                      |                                                                     |                                                               |                                         |
| Follow-up                         | 1 month                           | 3 months                                | <b>6 months</b>                                                     | 1 year                                                        |                                         |
| Population, age on the index date | <b>18 and above</b>               | All ages                                | Children                                                            | Adolescents                                                   | Older adults                            |
| Comparator group                  | Unexposed                         | <b>Reference drug, e.g., citalopram</b> | <i>Reference of all other in the group except the exposure drug</i> | Reference drug group, e.g., antidepressants or antipsychotics |                                         |
| Participants, washout             | <b>New users</b>                  | Recurrent new users                     | Naïve users <sup>a</sup>                                            | Recurrent naïve users                                         | Prevalent users                         |
| Washout, time                     | 6 months                          | <b>1 year</b>                           | 2 years                                                             | 5 years                                                       | Ever available in the data <sup>b</sup> |
| Washout, window                   | <b>Fixed date</b>                 | Moving window                           |                                                                     |                                                               |                                         |
| Exposure classification           | <b>Intention-to-treat</b>         | Time-dependent exposures                | Cumulative exposure                                                 |                                                               |                                         |
| <i>Analysis choices</i>           |                                   |                                         |                                                                     |                                                               |                                         |
| Outcome and covariate definition  | <b>Broad, e.g. hepatotoxicity</b> | <b>Narrow, e.g. toxic liver disease</b> | <b>Specific, e.g. hepatic necrosis</b>                              |                                                               |                                         |
| Diagnosis type, outcome           | <b>Primary diagnosis</b>          | Primary and secondary diagnoses         |                                                                     |                                                               |                                         |
| Type of hospitalization, outcome  | <b>Inpatient</b>                  | In- and outpatient                      | In- and outpatient and emergency visits                             |                                                               |                                         |
| Statistical analysis              | <b>Time-to-event, Cox</b>         | Time-to-event, Poisson                  | Binary outcome logistic regression                                  | Binary outcome, binomial regression                           |                                         |
| Sequential interval               | 1 month                           | 3 months                                | 6 month                                                             | <b>1 year</b>                                                 |                                         |
| Confounder adjustment             | <b>Age and sex</b>                | <b>Multivariate</b>                     | Propensity scores                                                   | Disease risk scores                                           | Doubly robust estimation                |
| Restriction                       | No restriction                    | <b>No previous outcome events</b>       | No previous events associated with outcome                          |                                                               |                                         |
| Matching                          | <b>No matching</b>                | Frequency                               | Individual                                                          | Covariate                                                     | Propensity score                        |

Options in bold represent main choices in the study; Options in italic represents additional choices; <sup>a</sup>users who haven't used any antidepressants; <sup>b</sup>length of washout increases during the study

**Table S3** Outcome definitions

| Medical event                                           | ICD-10 codes                                                                                        |
|---------------------------------------------------------|-----------------------------------------------------------------------------------------------------|
| <i>Blood and lymphatic system disorders</i>             |                                                                                                     |
| Hemolytic anemia <sup>a</sup>                           | D59                                                                                                 |
| AIHA <sup>a</sup>                                       | D59.0, D59.1                                                                                        |
| Aplasia pure red cell <sup>a</sup>                      | D60                                                                                                 |
| Aplastic anemia <sup>a, b</sup>                         | D61                                                                                                 |
| ITP <sup>a</sup>                                        | D69.3                                                                                               |
| Thrombocytopenia                                        | D69.3-D69.6                                                                                         |
| Agranulocytosis <sup>a, c</sup>                         | D70                                                                                                 |
| TTP <sup>a</sup>                                        | M31.1                                                                                               |
| <i>Immune system disorders</i>                          |                                                                                                     |
| Anaphylaxis <sup>a, d</sup>                             | T88.6, T78.2                                                                                        |
| <i>Psychiatric disorders</i>                            |                                                                                                     |
| Hypomania                                               | F30.0                                                                                               |
| Mania                                                   | F30                                                                                                 |
| Hallucinations                                          | R44                                                                                                 |
| Delusions <sup>a</sup>                                  | F22, F24, F23.3                                                                                     |
| Suicide                                                 | c_liste_49 = 48 <sup>j</sup>                                                                        |
| Self-harm                                               | X60-X84, Y10-Y34                                                                                    |
| <i>Nervous system disorders</i>                         |                                                                                                     |
| Seizures/epilepsy                                       | G40, G41                                                                                            |
| Hemorrhagic stroke                                      | I60, I61                                                                                            |
| Ischemic stroke                                         | I63, I64, G45.0, G45.1, G45.2, G45.3, G45.8, G45.9                                                  |
| PML <sup>a</sup>                                        | A81.2                                                                                               |
| Polyneuropathy                                          | G60.3, G60.8, G60.9, G62.0, G62.9                                                                   |
| <i>Cardiac disorders</i>                                |                                                                                                     |
| Arrhythmia <sup>a</sup>                                 | I47-I49                                                                                             |
| Ventricular arrhythmia <sup>a</sup>                     | I47.2, I49.0, I49.3                                                                                 |
| Ventricular fibrillation <sup>a</sup>                   | I49.0                                                                                               |
| Myocardial infarction                                   | I21-I22                                                                                             |
| Cardiomyopathies                                        | I42                                                                                                 |
| Cardiac arrest <sup>a, e</sup>                          | I46                                                                                                 |
| Heart failure                                           | I50                                                                                                 |
| <i>Vascular disorders</i>                               |                                                                                                     |
| Pulmonary hypertension <sup>a</sup>                     | I27.0                                                                                               |
| <i>Respiratory, thoracic, and mediastinal disorders</i> |                                                                                                     |
| Pulmonary fibrosis <sup>a</sup>                         | J84                                                                                                 |
| <i>Gastrointestinal disorders</i>                       |                                                                                                     |
| Intestinal perforation <sup>a</sup>                     | K63.1                                                                                               |
| Pancreatitis acute <sup>a</sup>                         | K85                                                                                                 |
| Pancreatitis acute, sensitivity                         | K85.0, K85.3, K85.8, K85.9                                                                          |
| Autoimmune pancreatitis <sup>a</sup>                    | K86.1                                                                                               |
| Pancreatitis, all <sup>a</sup>                          | K85, K86.1                                                                                          |
| <i>Hepatobiliary disorders</i>                          |                                                                                                     |
| Hepatotoxicity                                          | K71, K72, K74.0, K75.2, K75.4, K75.9, K76.0, K76.2, K76.3, K76.4, K76.5, K76.6, K76.7, R74.0, E80.7 |
| Toxic liver disease <sup>a, f</sup>                     | K71                                                                                                 |
| Hepatic necrosis <sup>a</sup>                           | K71.1                                                                                               |
| Hepatic failure <sup>a</sup>                            | K72                                                                                                 |
| Acute hepatic failure <sup>a, g</sup>                   | K72.0                                                                                               |
| Autoimmune hepatitis <sup>a</sup>                       | K75.4                                                                                               |
| Hepatic infarction <sup>a</sup>                         | K76.3                                                                                               |
| <i>Skin and subcutaneous tissue disorders</i>           |                                                                                                     |
| Dermatitis exfoliative <sup>a, h</sup>                  | L26                                                                                                 |
| Erythema multiforme <sup>a</sup>                        | L51                                                                                                 |
| Stevens-Johnson syndrome <sup>a</sup>                   | L51.1                                                                                               |
| Toxic epidermal necrolysis <sup>a</sup>                 | L51.2                                                                                               |
| Angio-neurotic edema <sup>a</sup>                       | T78.3                                                                                               |

*Musculoskeletal and connective tissue disorders*

Fractures S02, S07, S12, S22, S32, S42, S52, S62, S72, S82, S92  
Myopathy<sup>a, i</sup> G72.0, G72.9

*Renal and urinary disorders*

Acute kidney injury<sup>a</sup> N17  
Renal failure<sup>a</sup> N17-N19  
Hyponatremia E87.1

---

*AIHA* autoimmune hemolytic anemia, *ITP* immune thrombocytopenic purpura, *PML* progressive multifocal leukoencephalopathy, *TTP* thrombotic thrombocytopenic purpura

<sup>a</sup>Medical events from European Medicines Agency's Designated Medical Event list

<sup>b</sup>includes bone marrow failure and pancytopenia

<sup>c</sup>includes febrile neutropenia, granulocytopenia, neutropenic colitis, infections, and sepsis

<sup>d</sup>includes both anaphylactic and anaphylactoid shock/reaction

<sup>e</sup>includes sudden cardiac death

<sup>f</sup>includes drug-induced liver injury

<sup>g</sup>includes hepatitis fulminant and acute liver injury

<sup>h</sup>includes dermatitis exfoliative generalized

<sup>i</sup>includes rhabdomyolysis

<sup>j</sup>variable from the Cause of Death Register, c\_liste\_49 = 48 (suicide)

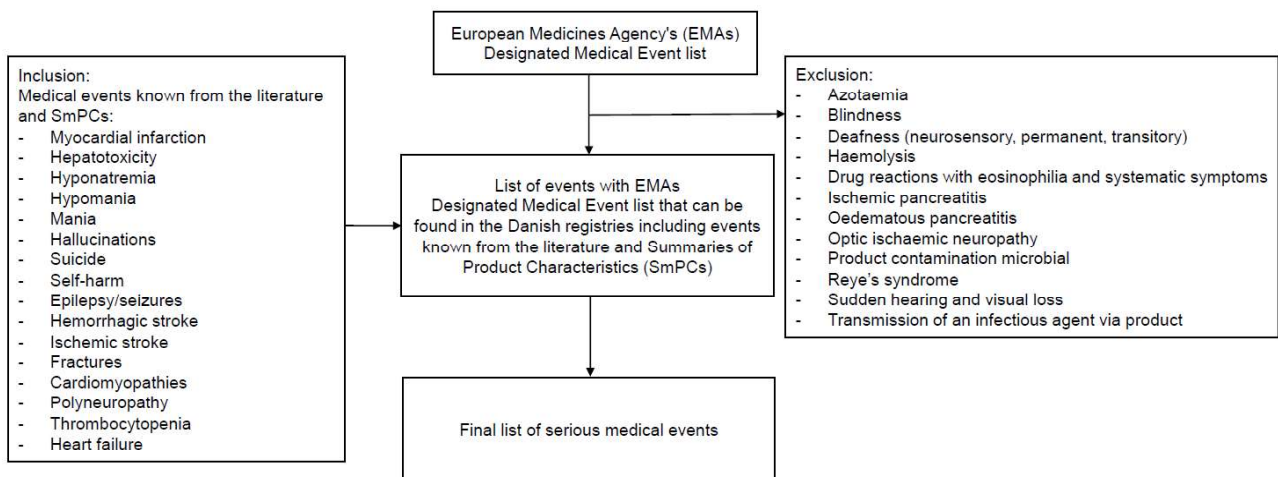

**Fig. S1** Selection of medical events from the European Medicines Agency's Designated Medical Event list, Summaries of Product Characteristics, and literature.

**Table S4** Potential safety signals detected in the surveillance system and corresponding events listed in Summaries of Product Characteristics (SmPCs)

| <i>Drug</i>         | Potential safety signal detected in surveillance system not listed in SmPCs                                                                                            | Detected in surveillance system and listed in SmPCs | Medical events listed in the SmPCs but not detected                                                                                                                                                                                                                                       |
|---------------------|------------------------------------------------------------------------------------------------------------------------------------------------------------------------|-----------------------------------------------------|-------------------------------------------------------------------------------------------------------------------------------------------------------------------------------------------------------------------------------------------------------------------------------------------|
| <i>Duloxetine</i>   |                                                                                                                                                                        | Suicides <sup>a</sup><br>Hyponatremia               | Arrhythmia<br>Epilepsy/seizures<br>Anaphylaxis<br>Hallucinations<br>Mania                                                                                                                                                                                                                 |
| <i>Escitalopram</i> | Acute hepatic failure<br>Acute kidney injury<br>Cardiomyopathy<br>Delusions<br>Hepatic failure<br>Hemorrhagic stroke<br>ITP<br>Intestinal perforation<br>Renal failure | Hyponatremia                                        | Angio-neurotic oedema<br>Epilepsy/seizures<br>Mania<br>Hallucinations<br>Self-harm <sup>a</sup><br>Thrombocytopenia<br>Anaphylaxis<br>Arrhythmia<br>Ventricular arrhythmia<br>Fractures                                                                                                   |
| <i>Fluoxetine</i>   | Delusions                                                                                                                                                              | Ventricular arrhythmia                              | Suicidal behaviour<br>Thrombocytopenia<br>Agranulocytosis<br>Arrhythmia<br>Epilepsy/seizures<br>Hyponatremia<br>Anaphylaxis<br>Hypomania<br>Mania<br>Hallucinations<br>Erythema multiforme<br>Stevens-Johnson syndrome<br>Toxic epidermal necrolysis<br>Angio-neurotic oedema             |
| <i>Paroxetine</i>   | Cardiomyopathy<br>Delusions<br>Polyneuropathy                                                                                                                          |                                                     | Fractures<br>Epilepsy/seizures<br>Renal failure<br>Thrombocytopenia<br>Hyponatremia<br>Self-harm <sup>a</sup><br>Hypomania<br>Mania<br>Hallucinations<br>Heart failure<br>Hepatic failure<br>Anaphylaxis<br>Erythema multiforme<br>Stevens-Johnson syndrome<br>Toxic epidermal necrolysis |
| <i>Sertraline</i>   | Heart failure<br>Hepatic necrosis<br>Toxic liver disease                                                                                                               | Hepatotoxicity <sup>b</sup>                         | Angio-neurotic oedema<br>Epilepsy/seizures<br>Myocardial infarction<br>Pancreatitis<br>Hyponatremia<br>Hallucinations<br>Self-harm <sup>a</sup>                                                                                                                                           |



|                                                                                       |                                                                  |                                                                                                                                                                                                                                                                                                                              |
|---------------------------------------------------------------------------------------|------------------------------------------------------------------|------------------------------------------------------------------------------------------------------------------------------------------------------------------------------------------------------------------------------------------------------------------------------------------------------------------------------|
|                                                                                       |                                                                  | Thrombocytopenia<br>Arrhythmia<br>Ventricular arrhythmia<br>Anaphylaxis<br>Stevens-Johnson syndrome<br>Toxic epidermal necrolysis                                                                                                                                                                                            |
| <i>Venlafaxine</i><br>Pulmonary fibrosis                                              | Arrhythmia <sup>c</sup><br>Hyponatremia<br>Suicides <sup>a</sup> | Thrombocytopenia<br>Mania<br>Pancreatitis<br>Epilepsy/seizures<br>Ventricular arrhythmia<br>Ventricular fibrillation<br>Aplastic anemia<br>Agranulocytose<br>Anaphylaxis<br>Hypomania<br>Hallucinations<br>Erythema multiforme<br>Stevens-Johnson syndrome<br>Toxic epidermal necrolysis<br>Angio-neurotic edema<br>Myopathy |
| <i>Citalopram</i><br>Fractures<br>Hepatic failure<br>Ischemic stroke<br>Renal failure | Cardiac arrest <sup>d</sup><br>Epilepsy/seizures                 | Angio-neurotic oedema<br>Hallucinations<br>Thrombocytopenia<br>Anaphylaxis<br>Arrhythmia<br>Ventricular arrhythmia<br>Hyponatremia<br>Mania<br>Self-harm <sup>a</sup>                                                                                                                                                        |

---

*ITP* immune thrombocytopenic purpura, *SmPCs* Summaries of Product Characteristics

<sup>a</sup>suicidal behaviour, <sup>b</sup>liver insufficiency/serious liver injury, <sup>c</sup>torsade de pointes, ventricular tachycardia, ventricular fibrillation, and QT prolongation, <sup>d</sup>QT prolongation;

**Table S5** Medical events and their appearance on the European Medicines Agency's Designated Medical Event list and Summaries of Product Characteristics of each of the investigated selective serotonin reuptake inhibitor and serotonin-norepinephrine reuptake inhibitor

| <i>Organ class</i><br>Medical event                     | European<br>Medicines<br>Agency's<br>Designated<br>Medical Event<br>list | Citalopram | Escitalopram | Duloxetine | Venlafaxine | Fluoxetine | Sertraline | Paroxetine |
|---------------------------------------------------------|--------------------------------------------------------------------------|------------|--------------|------------|-------------|------------|------------|------------|
| <i>Blood and lymphatic system disorders</i>             |                                                                          |            |              |            |             |            |            |            |
| Hemolytic anemia                                        | X                                                                        |            |              |            |             |            |            |            |
| AIHA                                                    | X                                                                        |            |              |            |             |            |            |            |
| Aplasia pure red<br>cell                                | X                                                                        |            |              |            |             |            |            |            |
| Aplastic anemia                                         | X                                                                        |            |              |            | X           |            |            |            |
| ITP                                                     | X                                                                        |            |              |            |             |            |            |            |
| Thrombocytopenia                                        |                                                                          | X          | X            |            | X           | X          | X          | X          |
| Agranulocytosis                                         | X                                                                        |            |              |            | X           | X          |            |            |
| TTP                                                     | X                                                                        |            |              |            |             |            |            |            |
| <i>Immune system disorders</i>                          |                                                                          |            |              |            |             |            |            |            |
| Anaphylaxis                                             | X                                                                        | X          | X            | X          | X           | X          | X          | X          |
| <i>Psychiatric disorders</i>                            |                                                                          |            |              |            |             |            |            |            |
| Hypomania                                               |                                                                          |            |              |            | X           | X          |            | X          |
| Mania                                                   |                                                                          | X          | X            | X          | X           | X          |            | X          |
| Hallucinations                                          |                                                                          | X          | X            | X          | X           | X          | X          | X          |
| Delusions                                               | X                                                                        |            |              |            |             |            |            |            |
| Suicide                                                 |                                                                          | X          | X            | X          | X           | X          | X          | X          |
| Self-harm                                               |                                                                          | X          | X            | X          | X           | X          | X          | X          |
| <i>Nervous system disorders</i>                         |                                                                          |            |              |            |             |            |            |            |
| Seizures/epilepsy                                       |                                                                          | X          | X            | X          | X           | X          | X          | X          |
| Hemorrhagic<br>stroke                                   |                                                                          |            |              |            |             |            |            |            |
| Ischemic stroke                                         |                                                                          |            |              |            |             |            |            |            |
| PML                                                     | X                                                                        |            |              |            |             |            |            |            |
| Polyneuropathy                                          |                                                                          |            |              |            |             |            |            |            |
| <i>Cardiac disorders</i>                                |                                                                          |            |              |            |             |            |            |            |
| Arrhythmia                                              | X                                                                        | X          | X            | X          | X           | X          | X          |            |
| Ventricular<br>arrhythmia                               | X                                                                        | X          | X            |            | X           | X          | X          |            |
| Ventricular<br>fibrillation                             | X                                                                        |            |              |            | X           |            |            |            |
| Myocardial<br>infarction                                |                                                                          |            |              |            |             |            | X          |            |
| <i>Cardiomyopathies</i>                                 |                                                                          |            |              |            |             |            |            |            |
| Cardiac arrest                                          | X                                                                        | X          |              |            |             |            |            |            |
| Heart failure                                           |                                                                          |            |              |            |             |            |            |            |
| <i>Vascular disorders</i>                               |                                                                          |            |              |            |             |            |            |            |
| Pulmonary<br>hypertension                               | X                                                                        |            |              |            |             |            |            |            |
| <i>Respiratory, thoracic, and mediastinal disorders</i> |                                                                          |            |              |            |             |            |            |            |
| Pulmonary fibrosis                                      | X                                                                        |            |              |            |             |            |            |            |
| <i>Gastrointestinal disorders</i>                       |                                                                          |            |              |            |             |            |            |            |
| Intestinal<br>perforation                               | X                                                                        |            |              |            |             |            |            |            |
| Pancreatitis acute                                      | X                                                                        |            |              |            |             |            |            |            |
| Pancreatitis acute,<br>sensitivity                      |                                                                          |            |              |            |             |            |            |            |
| Autoimmune<br>pancreatitis                              | X                                                                        |            |              |            |             |            |            |            |
| Pancreatitis, all                                       | X                                                                        |            |              |            | X           |            | X          |            |
| <i>Hepatobiliary disorders</i>                          |                                                                          |            |              |            |             |            |            |            |
| Hepatotoxicity                                          |                                                                          |            |              |            |             |            | X          |            |
| Toxic liver disease                                     | X                                                                        |            |              |            |             |            |            |            |
| Hepatic necrosis                                        | X                                                                        |            |              |            |             |            |            |            |
| Hepatic failure                                         | X                                                                        |            |              | X          |             |            |            | X          |
| Acute hepatic<br>failure                                | X                                                                        |            |              | X          |             |            |            |            |
| Autoimmune<br>hepatitis                                 | X                                                                        |            |              |            |             |            |            |            |

|                                                        |   |   |   |   |   |   |   |   |   |
|--------------------------------------------------------|---|---|---|---|---|---|---|---|---|
| Hepatic infarction                                     | X |   |   |   |   |   |   |   |   |
| <i>Skin and subcutaneous tissue disorders</i>          |   |   |   |   |   |   |   |   |   |
| Dermatitis exfoliative                                 | X |   |   |   |   |   |   |   |   |
| Erythema multiforme                                    | X |   |   |   | X | X |   |   | X |
| Stevens-Johnson syndrome                               | X |   | X | X | X | X | X | X | X |
| Toxic epidermal necrolysis                             | X |   |   |   | X | X | X | X | X |
| Angio-neurotic edema                                   | X | X | X | X | X | X | X | X |   |
| <i>Musculoskeletal and connective tissue disorders</i> |   |   |   |   |   |   |   |   |   |
| Fractures                                              |   |   | X |   |   |   |   |   | X |
| Myopathy                                               | X |   |   |   | X |   |   |   |   |
| <i>Renal and urinary disorders</i>                     |   |   |   |   |   |   |   |   |   |
| Acute kidney injury                                    | X |   |   |   |   |   |   |   |   |
| Renal failure                                          | X |   |   |   |   |   |   |   |   |
| Hyponatremia                                           |   | X | X | X | X | X | X | X | X |

*AIHA* autoimmune hemolytic anemia, *ITP* immune thrombocytopenic purpura, *PML* progressive multifocal leukoencephalopathy, *TTP* thrombotic thrombocytopenic purpura
